# Supplementary material for: Enrichment of the tumour immune microenvironment in patients with desmoplastic colorectal liver metastasis
Source: PubMed Central journal article supplement (PMC7374625; doi:10.1038/s41416-020-0881-z), 2020-05-18
Supplement: 41416_2020_881_MOESM1_ESM.pdf [file 41416_2020_881_MOESM1_ESM.pdf]

**Supplementary table 1.** Comparison of the HGP and the TME by clinical risk score.

|                                                               |          | Clinical risk score   |                        |         |
|---------------------------------------------------------------|----------|-----------------------|------------------------|---------|
|                                                               |          | Low risk<br>(CRS 0-2) | High risk<br>(CRS 3-5) |         |
| <i>All patients</i>                                           |          | n = 158 (%)           | n = 33 (%)             | p-value |
| Histopathological growth pattern                              | dHGP     | 41 (26)               | 4 (12)                 | 0.089   |
|                                                               | non-dHGP | 117 (74)              | 29 (88)                |         |
| <i>Cohort A: semi-quantitative IHC</i>                        |          | n = 101 (%)           | n = 16 (%)             | p-value |
| Histopathological growth pattern                              | dHGP     | 30 (30)               | 2 (12)                 | 0.151   |
|                                                               | non-dHGP | 71 (70)               | 14 (88)                |         |
| CD8 - high peritumoural                                       |          | 67 (66)               | 10 (62)                | 0.764   |
| CD8 - high stromal                                            |          | 48 (48)               | 11 (69)                | 0.123   |
| CD8 - high intratumoural                                      |          | 36 (36)               | 6 (38)                 | 0.886   |
| CD4 - high peritumoural                                       |          | 28 (28)               | 2 (12)                 | 0.195   |
| CD4 - high stromal                                            |          | 17 (17)               | 3 (19)                 | 0.877   |
| FoxP3 - high peritumoural                                     |          | 73 (73)               | 11 (69)                | 0.724   |
| FoxP3 - high stromal                                          |          | 63 (64)               | 9 (56)                 | 0.571   |
| <i>Cohort B: quantitative IHC</i>                             |          | n = 22 (%)            | n = 8 (%)              | p-value |
| Histopathological growth pattern                              | dHGP     | 7 (32)                | 2 (25)                 | 0.719   |
|                                                               | non-dHGP | 15 (68)               | 6 (75)                 |         |
| CD8 - intratumoural counts/mm <sup>2</sup> - (median [IQR])   |          | 50.9 [26.1, 77.4]     | 76.4 [55.8, 168.0]     | 0.159   |
| CD8 - peritumoural counts/mm <sup>2</sup> - (median [IQR])    |          | 918.2 [694.6, 1093.3] | 892.0 [702.7, 1257.4]  | 0.851   |
| FoxP3 - intratumoural counts/mm <sup>2</sup> - (median [IQR]) |          | 24.1 [11.8, 46.8]     | 32.0 [5.4, 103.0]      | 0.888   |
| FoxP3 - peritumoural counts/mm <sup>2</sup> - (median [IQR])  |          | 126.5 [75.1, 254.4]   | 150.2 [52.5, 366.2]    | 0.851   |
| <i>Cohort C: flow cytometry (fresh tumour tissues)</i>        |          | n = 57 (%)            | n = 17 (%)             | p-value |
| Histopathological growth pattern                              | dHGP     | 10 (18)               | 2 (12)                 | 0.570   |
|                                                               | non-dHGP | 47 (82)               | 15 (88)                |         |
| % CD8+ T-cells* - (median [IQR])                              |          | 27.2 [22.3, 37.0]     | 28.5 [24.5, 34.4]      | 0.928   |
| % CD4+ T-cells* - (median [IQR])                              |          | 62.0 [47.2, 69.2]     | 60.5 [56.7, 69.9]      | 0.363   |
| % CD4+ FoxP3- T-cells* - (median [IQR])                       |          | 51.3 [38.5, 61.0]     | 54.7 [50.6, 59.9]      | 0.317   |
| % CD4+ FoxP3+ T-cells* - (median [IQR])                       |          | 6.7 [4.0, 10.0]       | 8.8 [5.6, 11.4]        | 0.371   |

\* Expressed as percentage of CD3+ T-cells gate

Abbreviations in alphabetical order: CRS: *clinical risk score*; dHGP: *desmoplastic type histopathological growth pattern*; HGP: *histopathological growth pattern*; IHC: *immunohistochemistry*; IQR: *interquartile range*; non-dHGP: *non-desmoplastic type histopathological growth pattern*; TME: *tumour microenvironment*.
