# Supplementary material for: Enrichment of the tumour immune microenvironment in patients with desmoplastic colorectal liver metastasis
Source: PubMed Central journal article supplement (PMC7374625; doi:10.1038/s41416-020-0881-z), 2020-05-18
Supplement: 41416_2020_881_MOESM2_ESM.pdf [file 41416_2020_881_MOESM2_ESM.pdf]

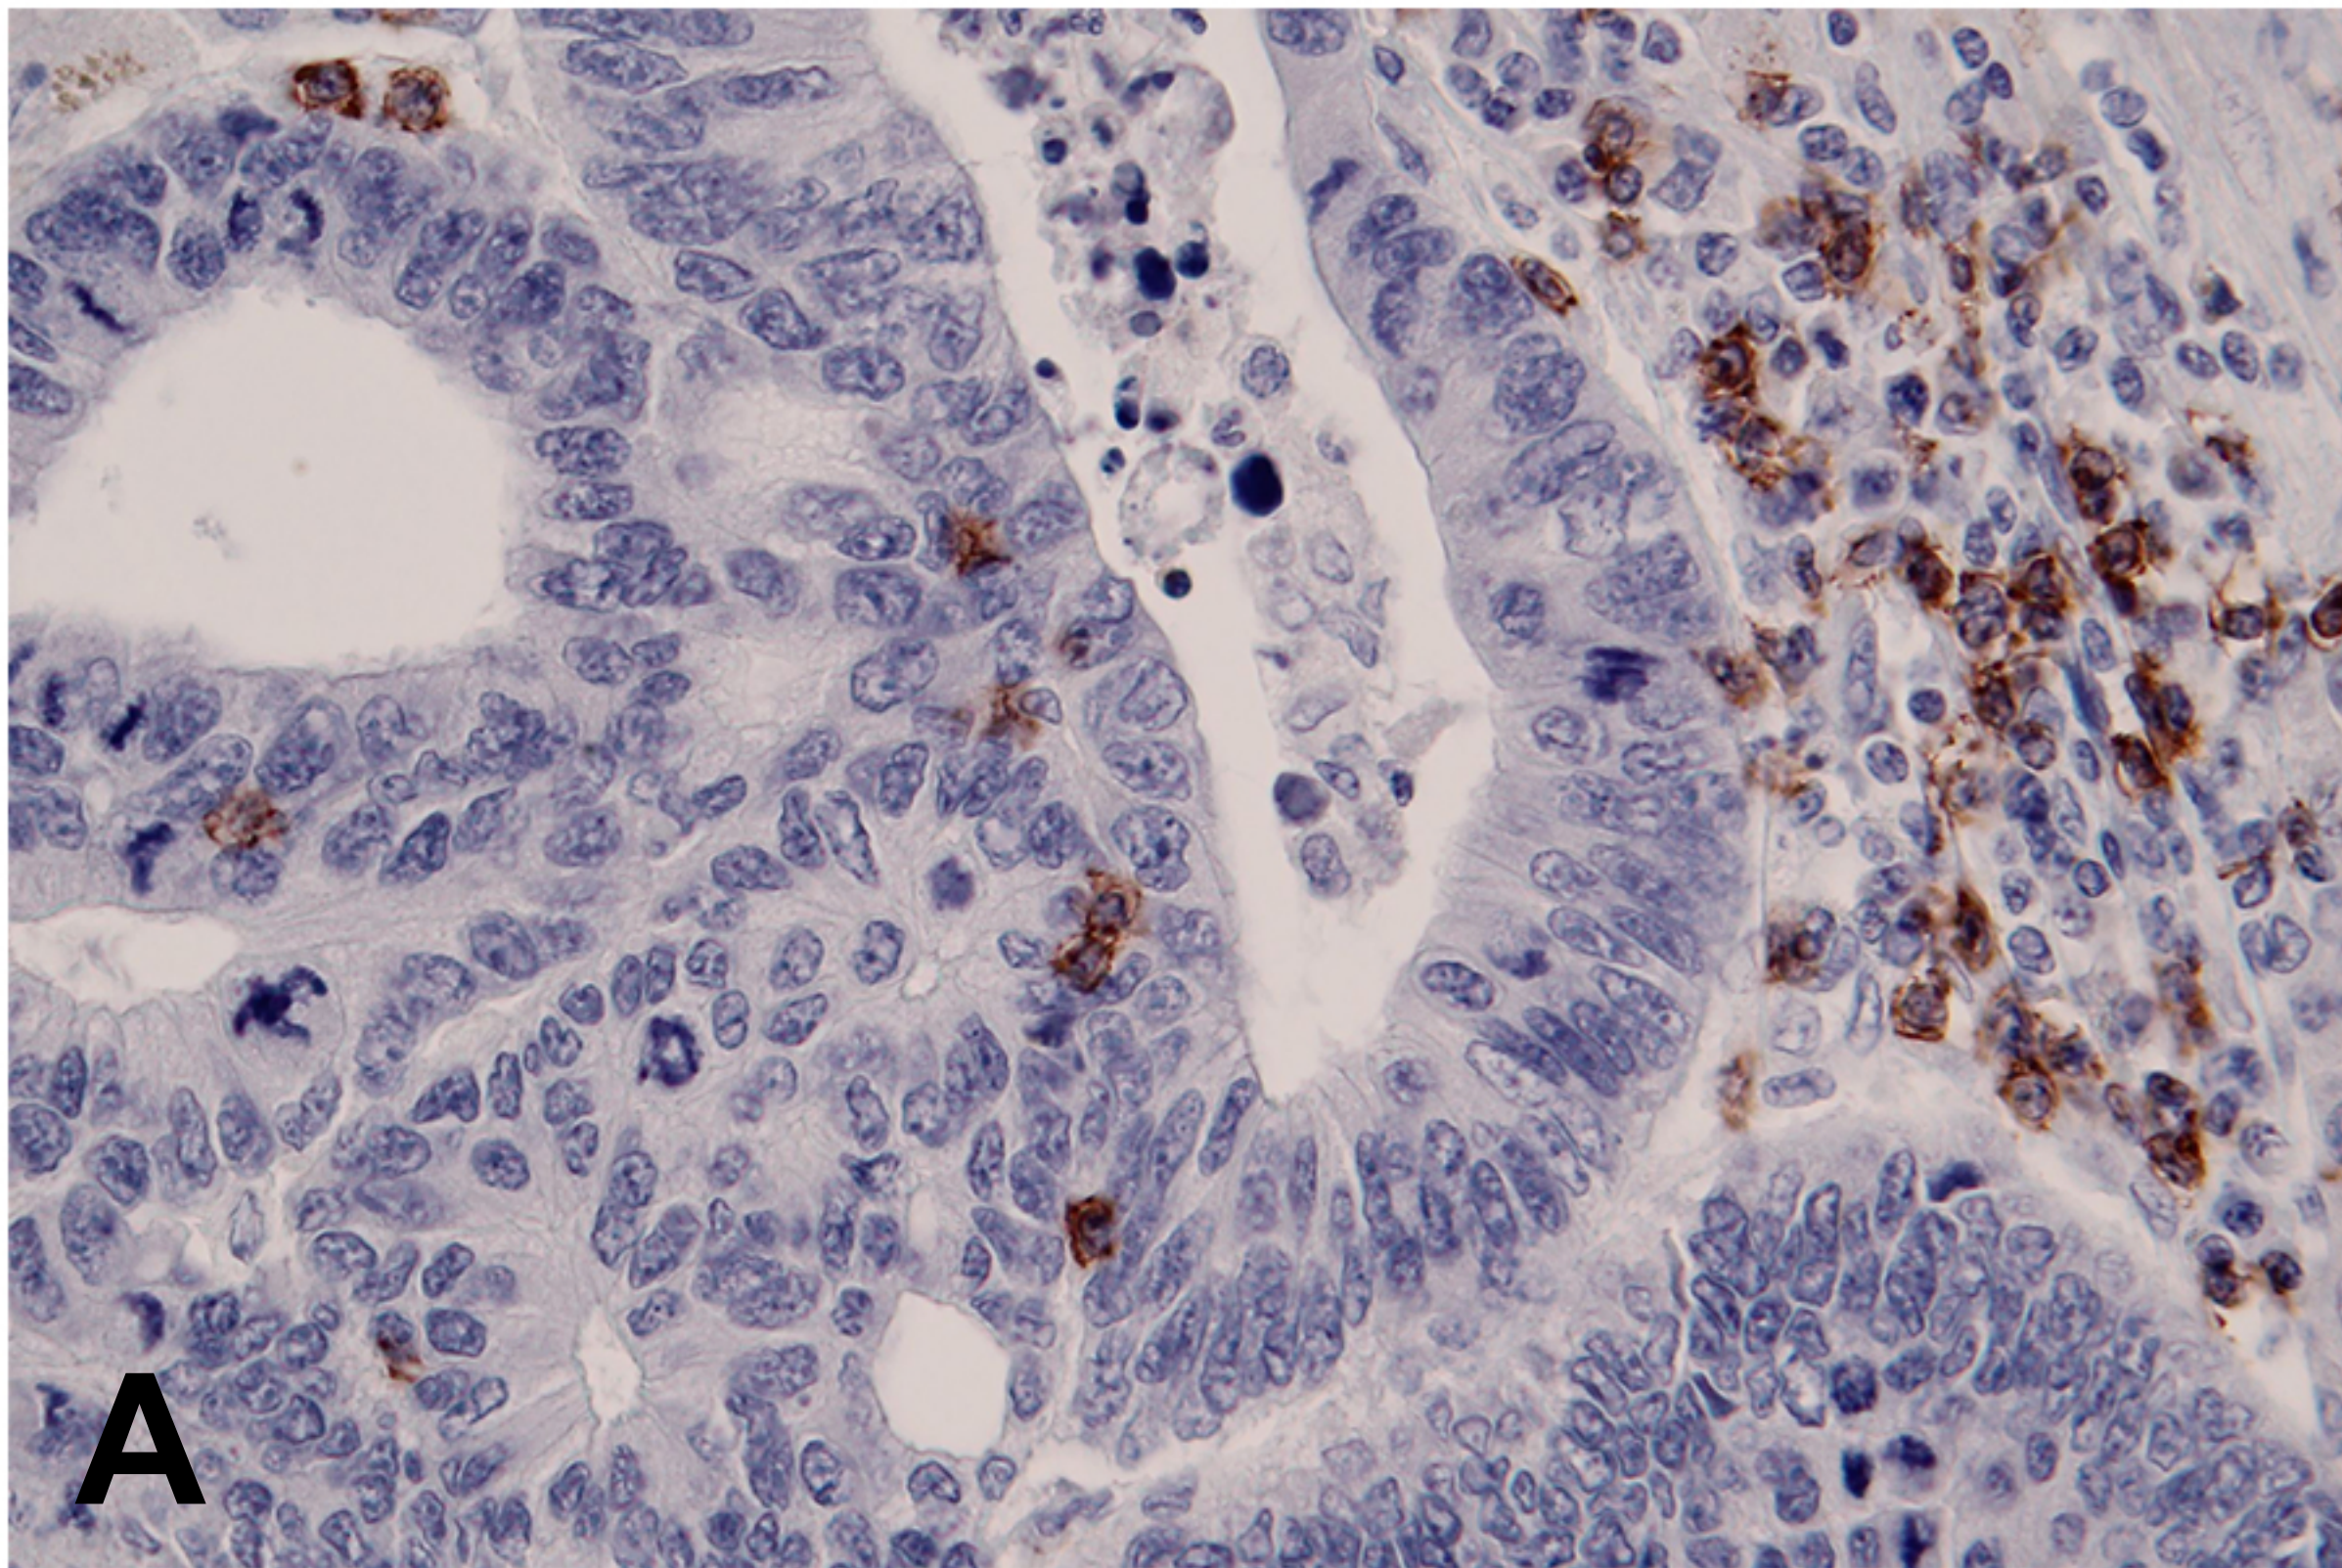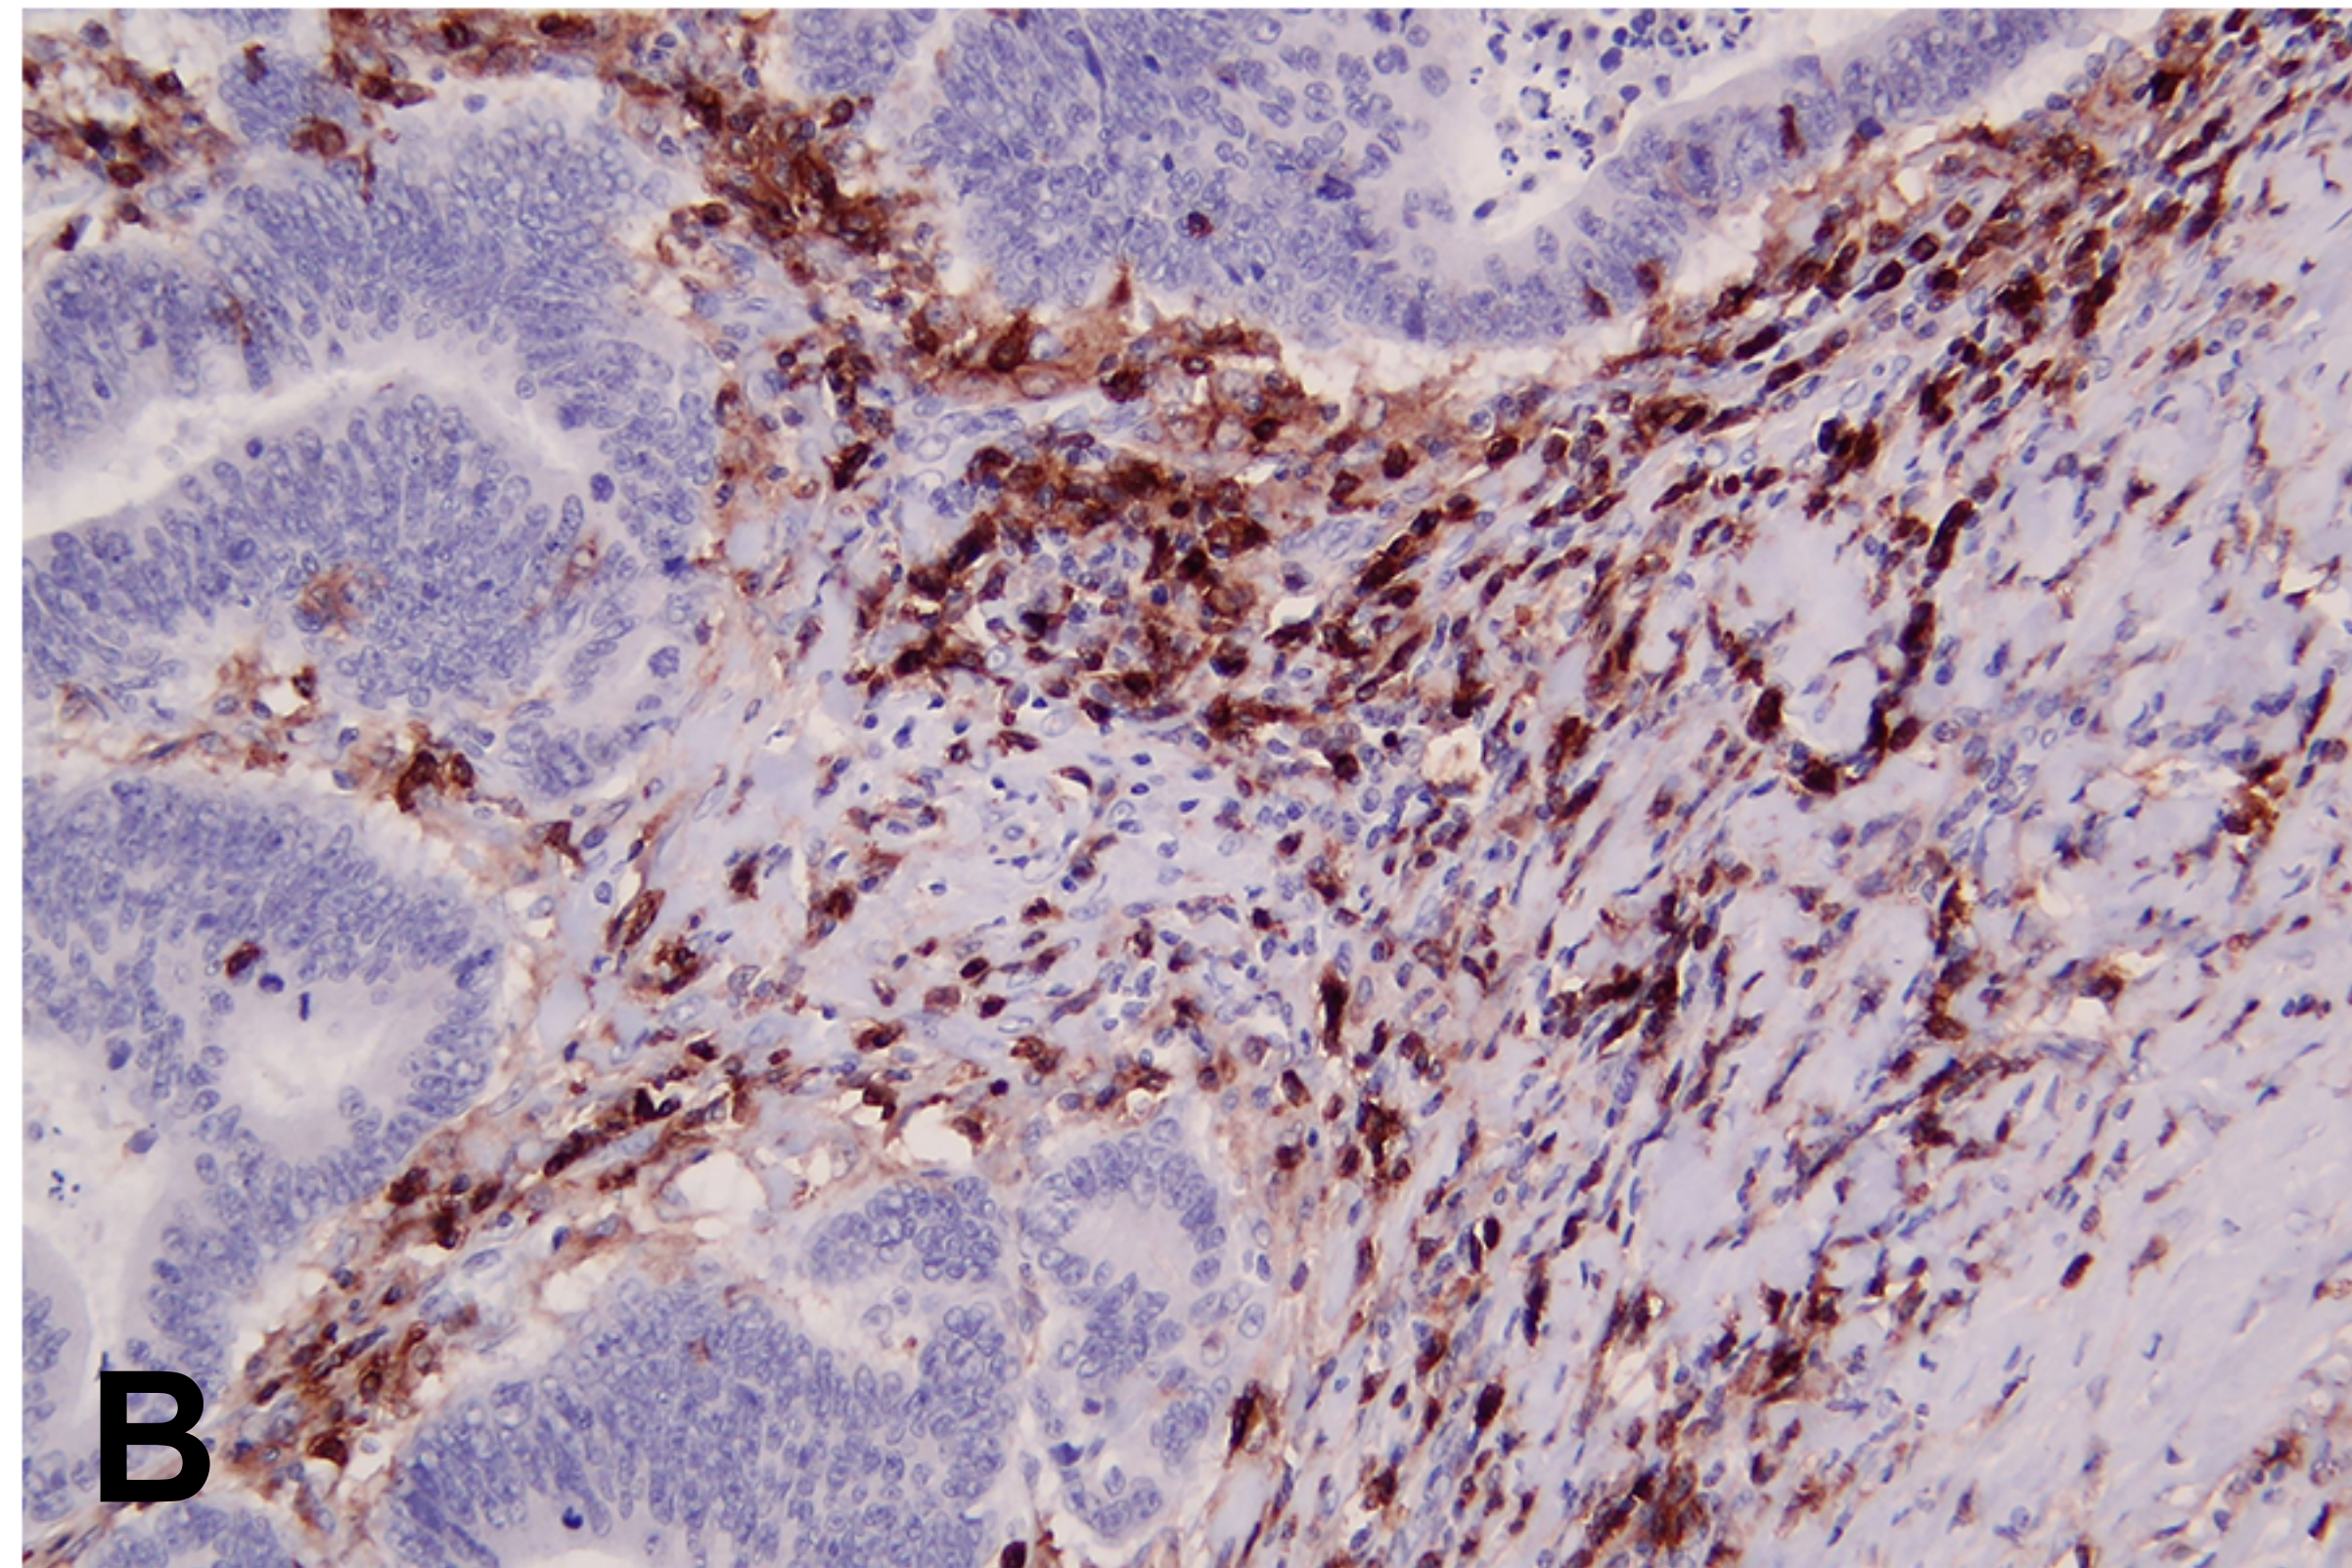

**Supplementary figure 1:** examples of immunohistochemistry (IHC) staining used in cohort A. **(A)** CD8 IHC staining. **(B)** CD4 IHC staining.
